# Supplementary material
Source: publisher figshare collection journal article supplement (https://karger.figshare.com/ndownloader/files/14441747)
Supplement: Supplementary file 1 [file 14441747]

Supplementary Table S1. Characteristic of subjects (longitudinal analysis)

|                                     | All subjects | category based on the serum concentration of TSH |              |               |              | <sup>a</sup> <i>p</i> value |
|-------------------------------------|--------------|--------------------------------------------------|--------------|---------------|--------------|-----------------------------|
|                                     |              | below-normal                                     | lower-normal | higher-normal | above-normal |                             |
| Subjects                            | 7,609        | 332                                              | 5,927        | 1,111         | 239          |                             |
| <sup>b</sup> Age (years)            | 52.8 ± 10.1  | 51.3 ± 9.2                                       | 52.1 ± 9.8   | 55.9 ± 11.0   | 57.8 ± 10.3  | <0.001                      |
| Men (%)                             | 68.7         | 69.3                                             | 70.3         | 61.3          | 62.5         | <0.001                      |
| Obesity (%)                         | 23.2         | 20.8                                             | 23.9         | 19.8          | 22.5         | 0.02                        |
| BMI (Kg / m <sup>2</sup> )          | 23.0 ± 3.3   | 22.8 ± 3.1                                       | 23.0 ± 3.3   | 22.6 ± 3.5    | 22.8 ± 3.3   | <0.01                       |
| Serum TSH (mU/L)                    | 1.69 ± 1.16  | 0.39 ± 0.15                                      | 1.35 ± 0.47  | 3.05 ± 0.49   | 5.78 ± 2.38  | <0.001                      |
| Systolic blood pressure (mmHg)      | 124.3 ± 18.8 | 123.2 ± 17.7                                     | 124.5 ± 18.8 | 123.3 ± 19.2  | 125.1 ± 18.4 | 0.13                        |
| Diastolic blood pressure (mmHg)     | 78.2 ± 11.5  | 77.4 ± 10.7                                      | 78.4 ± 11.5  | 77.4 ± 11.7   | 78.6 ± 11.3  | 0.02                        |
| Serum LDL cholesterol (mg/dL)       | 120.2 ± 29.5 | 117.2 ± 32.8                                     | 120.2 ± 29.3 | 120.9 ± 29.4  | 121.0 ± 28.9 | 0.25                        |
| Serum HDL cholesterol (mg/dL)       | 61.9 ± 15.7  | 62.5 ± 16.5                                      | 61.6 ± 15.6  | 63.6 ± 15.8   | 63.3 ± 15.5  | <0.001                      |
| Serum triglyceride (mg/dL)          | 105.4 ± 72.4 | 99.2 ± 60.7                                      | 105.9 ± 74.3 | 105.4 ± 65.0  | 102.0 ± 54.7 | 0.35                        |
| Serum uric acid (mg/dL)             | 5.5 ± 1.3    | 5.4 ± 1.3                                        | 5.5 ± 1.3    | 5.4 ± 1.3     | 5.4 ± 1.2    | <0.01                       |
| Serum fasting blood glucose (mg/dL) | 101.7 ± 17.0 | 101.2 ± 13.8                                     | 101.8 ± 17.1 | 101.9 ± 17.6  | 100.1 ± 14.2 | 0.44                        |
| Proteinuria (%)                     | 6.5          | 4.8                                              | 6.8          | 6.3           | 2.5          | 0.03                        |
| Hematuria (%)                       | 14.2         | 13.6                                             | 14.3         | 13.7          | 16.3         | 0.74                        |

|                                    |             |             |             |            |            |        |
|------------------------------------|-------------|-------------|-------------|------------|------------|--------|
| eGFR (mL/min/1.73 m <sup>2</sup> ) | 75.4 ± 10.7 | 78.3 ± 11.4 | 75.7 ± 10.8 | 73.4 ± 9.7 | 73.3 ± 9.9 | <0.001 |
| Medication                         |             |             |             |            |            |        |
| Hypertension (%)                   | 14.5        | 12.3        | 14.3        | 16.3       | 13.3       | 0.22   |
| Dyslipidemia (%)                   | 9.5         | 9.0         | 9.3         | 9.9        | 13.3       | 0.20   |
| Diabetes mellitus (%)              | 3.1         | 2.1         | 3.1         | 4.0        | 2.5        | 0.26   |
| Hyperuricemia (%)                  | 4.6         | 3.0         | 4.6         | 4.9        | 5.4        | 0.49   |

<sup>a</sup>To compare among four categories, one-way analysis of variance for values and chi-square test for proportion were performed. *p* value of less than 0.05 was considered to be statistically significant.

<sup>b</sup>Continuous variables are expressed as mean ± standard deviation. Categorical values are expressed as number (percentage).

BMI = body mass index; TSH = thyroid stimulating hormone; LDL = low-density lipoprotein; HDL = high-density lipoprotein; eGFR = estimated glomerular filtration rate

Supplementary Table S2. Association of serum TSH concentration with prevalence of eGFR <45 mL/min./1.73 m<sup>2</sup>

|                                 | Number of<br>eGFR <45 mL/min./1.73 m <sup>2</sup><br>/total | <sup>a</sup> Model 0<br>OR (95%CI) | <sup>c</sup> <i>p</i> value | <sup>b</sup> Model 1<br>OR (95%CI) | <i>p</i> value |
|---------------------------------|-------------------------------------------------------------|------------------------------------|-----------------------------|------------------------------------|----------------|
| below-normal TSH (<0.54 (mU/L)) | 4/651                                                       | 0.50 (0.19-1.36)                   | 0.18                        | 0.81 (0.29-2.26)                   | 0.68           |
| lower-normal TSH (0.54-2.40)    | 150/12,451                                                  | 1.000 (reference)                  |                             | 1.000 (reference)                  |                |
| higher-normal TSH (2.41-4.26)   | 67/2,643                                                    | 2.14 (1.60-2.86)                   | <0.001                      | 1.32 (0.95-1.83)                   | 0.10           |
| above-normal TSH (>4.26)        | 19/645                                                      | 2.49 (1.54-4.04)                   | <0.001                      | 1.10 (0.63-1.92)                   | 0.73           |

<sup>a</sup>Model 0: Unadjusted

<sup>b</sup>Model 1: Adjusted for age, sex, obesity, hypertension, dyslipidemia, hyperuricemia, hyperglycemia, proteinuria, and hematuria.

<sup>c</sup>*p*-value of less than 0.05 was considered to be statistically significant

TSH = thyrotropin; CKD = chronic kidney disease; OR = odd ratio; CI = confidence interval

Supplementary Table S3. Comparison of the change in eGFR among four TSH category groups

|                                 | Number | <sup>a</sup> change of<br>eGFR (%) | eGFR in 2013<br>(mL/min./1.73m <sup>2</sup> ) | eGFR in 2016<br>(mL/min./1.73m <sup>2</sup> ) |
|---------------------------------|--------|------------------------------------|-----------------------------------------------|-----------------------------------------------|
| below-normal TSH (<0.54 (mU/L)) | 332    | 3.2 ± 9.5                          | 78.3 ± 11.4                                   | 75.4 ± 11.1                                   |
| lower-normal TSH (0.54-2.40)    | 5,927  | 1.8 ± 9.1                          | 75.7 ± 10.8                                   | 74.2 ± 11.2                                   |
| higher-normal TSH (2.41-4.26)   | 1,111  | 1.3 ± 8.8                          | 73.4 ± 9.7                                    | 72.2 ± 10.2                                   |
| above-normal TSH (> 4,26)       | 239    | 1.3 ± 8.3                          | 73.3 ± 9.9                                    | 72.4 ± 11.5                                   |

<sup>a</sup>Change of eGFR was calculated as a following equation: (eGFR in 2016 – eGFR in 2013) / eGFR in 2013

Values are expressed as number or mean ± standard deviation.

eGFR = estimated glomerular filtration rate; SD = standard deviation; TSH = thyrotropin
